# Supplementary material
Source: publisher figshare collection journal article supplement (https://acs.figshare.com/ndownloader/files/5740164)
Supplement: Supplementary file 1 [file 5740164]

## **Supporting Information**

### **Full-Color Photochromism of Diarylethene Crystals**

**Masakazu Morimoto, Seiya Kobatake, and Masahiro Irie\***

*Department of Chemistry and Biochemistry, Graduate School of Engineering, Kyushu University*

*Hakozaki 6-10-1, Higashi-ku, Fukuoka 812-8581, Japan*

(a)

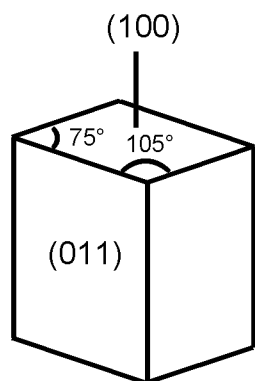

(b)

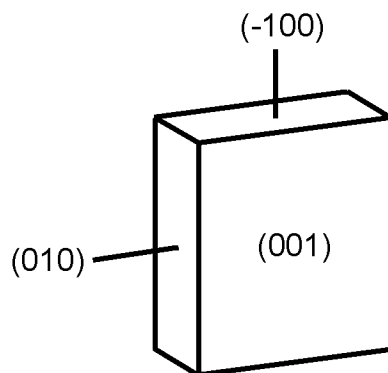

**Figure S1.** Shapes of crystals **1a/2a- $\alpha$**  and **1a/2a/3a** (a), and crystal **1a/2a- $\beta$**  (b). The shapes of crystals **1a/2a- $\alpha$**  and **1a/2a/3a** are the same as that of crystal **2a**, and the shape of crystal **1a/2a- $\beta$**  is the same as that of crystal **1a**.

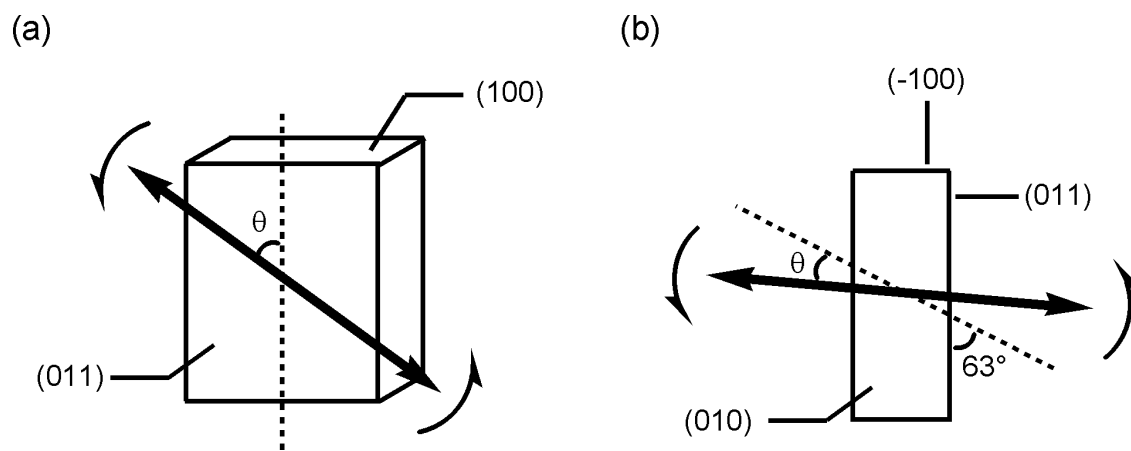

**Figure S2.** Correlation between crystal shapes and direction of polarized light in measurement of polarized absorption spectra: (a) crystals **1a/2a-α** and **1a/2a/3a**, (b) crystal **1a/2a-β**. Bold arrows show direction of polarized light.
